# Supplementary material
Source: PubMed Central journal article supplement (PMC7021587)

# Supplementary file 1

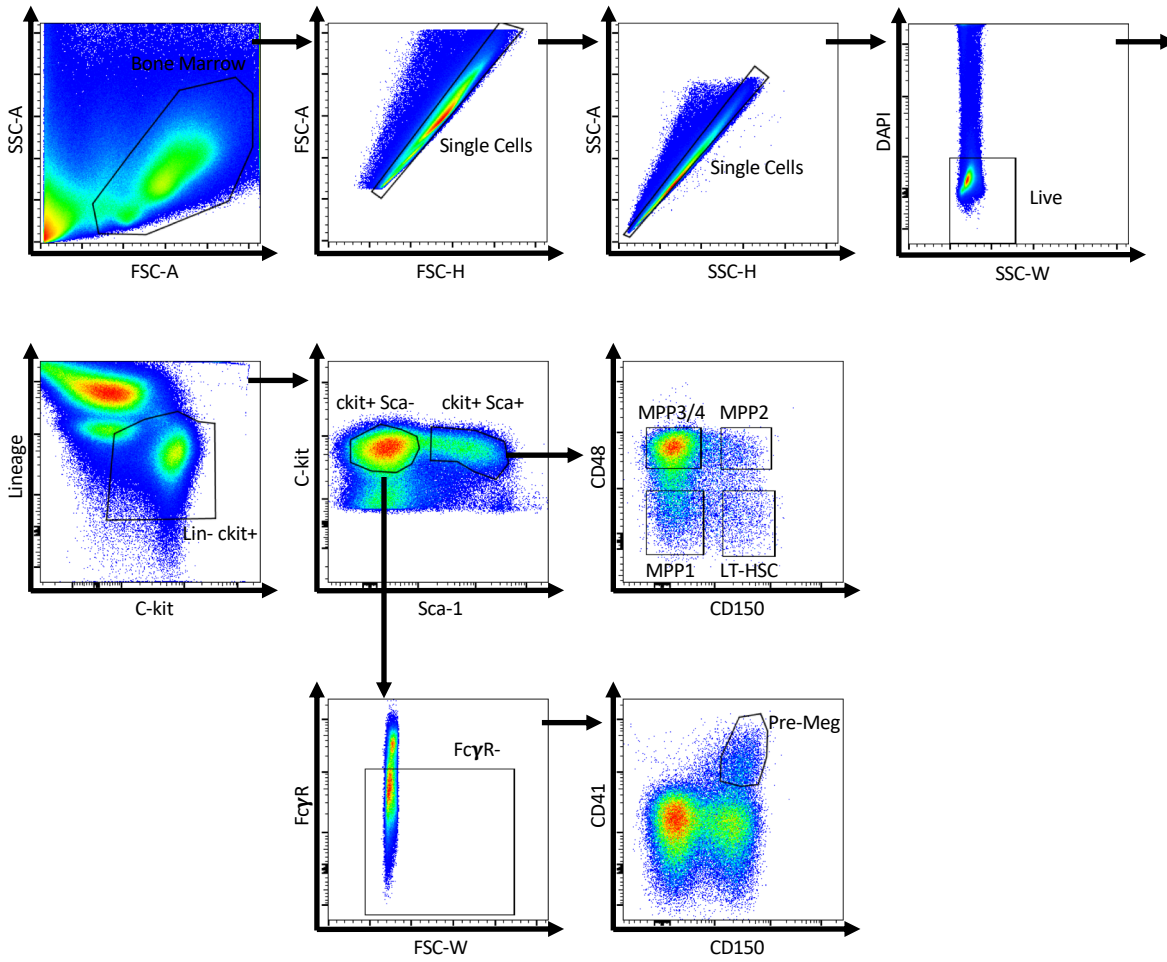

# Supplementary file 2

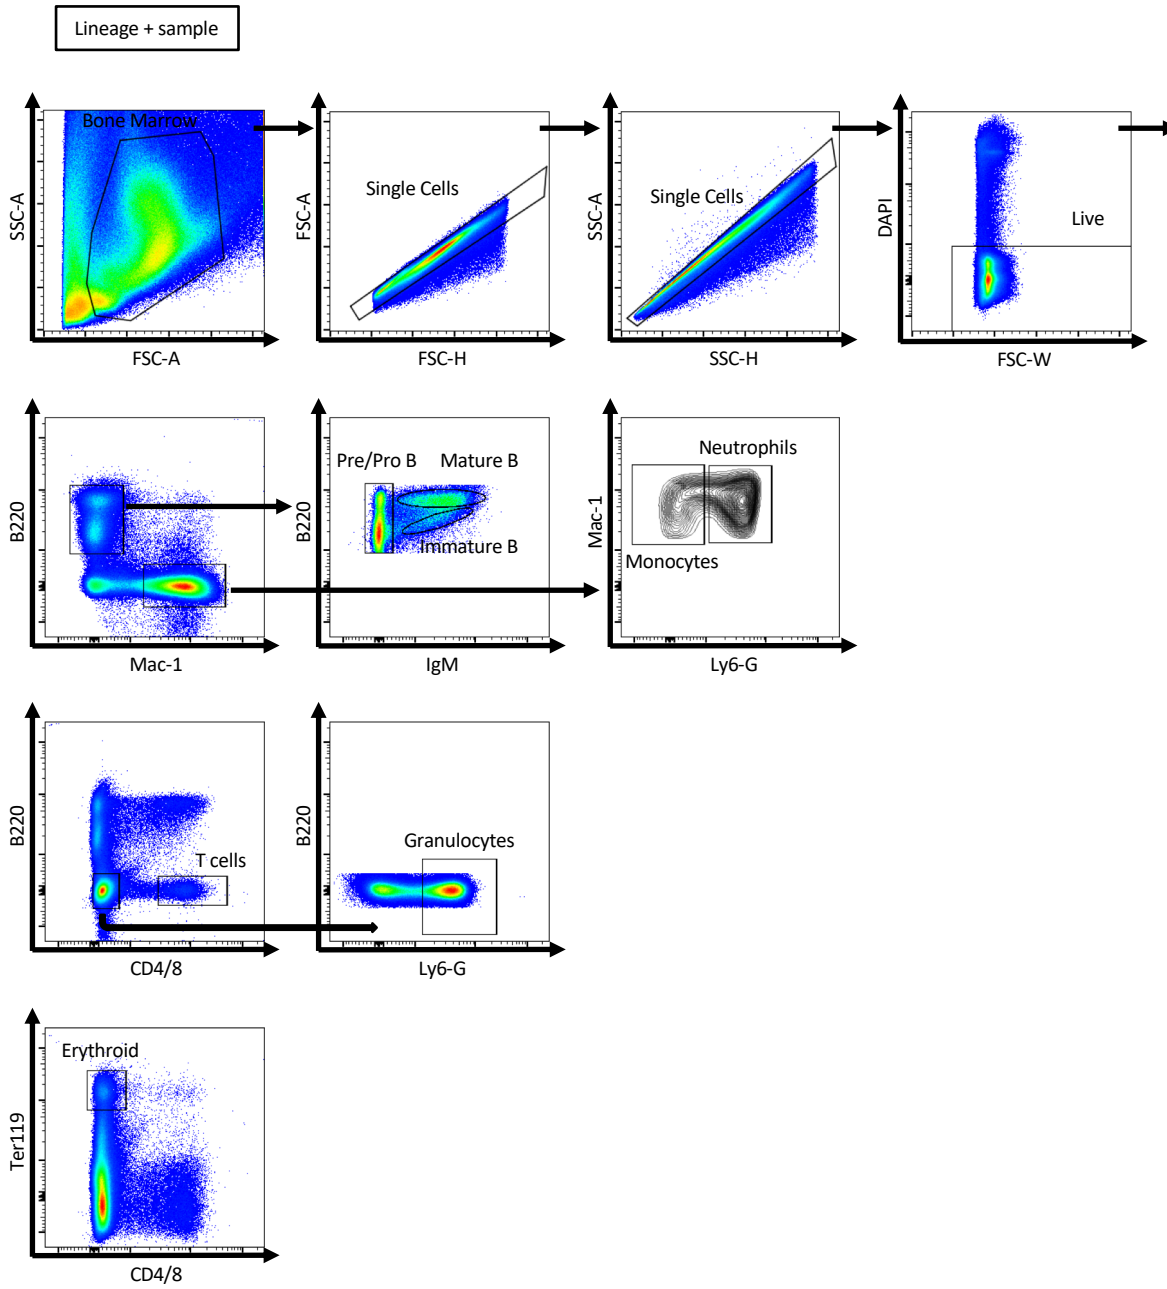

# Supplementary file 3

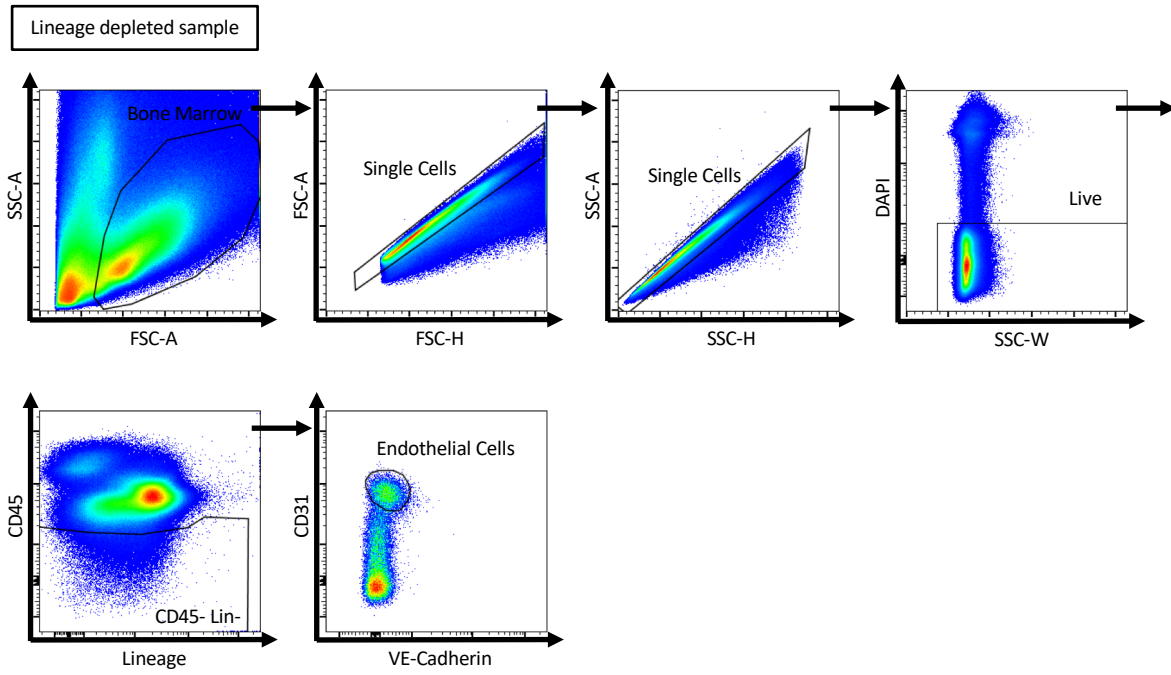

Supplement: NIHMS1546022-supplement-1.pdf [file NIHMS1546022-supplement-1.pdf]
